# Supplementary material for: Genome-wide analysis of differential RNA editing in epilepsy
Source: Genome Res. 2017 Mar;27(3):440–50. doi: 10.1101/gr.210740.116 (PMC5340971; doi:10.1101/gr.210740.116)
Supplement: Supplemental Material [file supp_gr.210740.116_Supplement_Table_S2.xlsx]

## Sheet: All sites
Supplementary Table 2: List of "all" RNA edited sites that significantly varied in RNA editing percentages between epileptic and naïve mice.
Chromosome	Edited site (bp)	Genomic nucleotide (+ strand)	Alternate nucleotide (+ strand)	Ensemble gene id	Gene Symbol	Average editing percentage in controls	Average editing percentage in cases	Average RE difference (% cases - % controls)	Binomial test p value	Wilcox test p value
chr10	49272789	T	C	ENSMUSG00000056073	Grik2	68.2686	73.8289	5.56022	2.27052e-06	1.53107e-06
chr10	60132705	A	G	ENSMUSG00000058297	Spock2	0.309681	0.683298	0.373617	1.96769e-07	0.000117943
chr10	60301793	C	T	ENSMUSG00000004207	Psap	0.0330371	0.137687	0.10465	2.82273e-07	0.000357484
chr10	80567359	T	C	ENSMUSG00000035397	Klf16	8.78527	2.39313	-6.39214	9.60746e-22	5.80264e-11
chr10	86837257	A	G	ENSMUSG00000054027	Nt5dc3	85.7247	79.4728	-6.2519	1.27006e-12	2.92285e-10
chr10	86837260	A	G	ENSMUSG00000054027	Nt5dc3	24.0214	20.237	-3.78432	3.09248e-06	3.3196e-06
chr10	88470177	T	C	ENSMUSG00000020059	Sycp3	0.175542	3.43536	3.25982	9.16522e-15	4.91554e-07
chr10	88470180	T	C	ENSMUSG00000020059	Sycp3	0	1.24508	1.24508	6.01137e-12	0.000677951
chr10	88470481	T	C	ENSMUSG00000020059	Sycp3	1.12744	5.7843	4.65687	3.79367e-15	1.68344e-06
chr11	102887518	A	G	ENSMUSG00000020932	Gfap	0.00720906	0.206162	0.198953	1.71575e-07	7.14324e-06
chr11	102887571	A	G	ENSMUSG00000020932	Gfap	0.00231125	0.0963374	0.0940262	0.000694312	1.77534e-05
chr11	102887574	A	C	ENSMUSG00000020932	Gfap	0.0018696	0.0983358	0.0964662	0.00121808	7.30673e-09
chr11	102887583	G	A	ENSMUSG00000020932	Gfap	0.00176471	0.0211448	0.0193801	1.83637e-06	0.00299624
chr11	102887645	A	C	ENSMUSG00000020932	Gfap	0	0.0217858	0.0217858	2.2754e-07	0.000677951
chr11	102887836	T	C	ENSMUSG00000020932	Gfap	0.00232607	0.130002	0.127676	0.00252334	4.69719e-07
chr11	102887953	A	G	ENSMUSG00000020932	Gfap	0.00267165	0.156302	0.153631	0.00368719	6.06842e-05
chr11	102887997	T	C	ENSMUSG00000020932	Gfap	0	0.0557557	0.0557557	1.34404e-07	2.71559e-06
chr11	102888127	A	G	ENSMUSG00000020932	Gfap	0.00282885	0.0656885	0.0628597	2.23171e-05	0.00177895
chr11	102888277	C	T	ENSMUSG00000020932	Gfap	0	0.0396603	0.0396603	2.18667e-07	2.71559e-06
chr11	102888317	A	G	ENSMUSG00000020932	Gfap	0	0.0647345	0.0647345	6.22806e-10	1.44309e-08
chr11	102888417	T	C	ENSMUSG00000020932	Gfap	0.00189979	0.0793964	0.0774967	0.00566422	1.77534e-05
chr11	102888449	T	C	ENSMUSG00000020932	Gfap	0	0.169355	0.169355	0.000739766	1.07901e-10
chr11	102888450	C	T	ENSMUSG00000020932	Gfap	0.0206641	0.15234	0.131676	0.000120874	4.21189e-05
chr11	102888455	C	T	ENSMUSG00000020932	Gfap	0.00264443	0.0303688	0.0277244	1.68557e-10	0.000586807
chr11	102888469	T	C	ENSMUSG00000020932	Gfap	0	0.0491218	0.0491218	4.27056e-05	2.71559e-06
chr11	102888527	A	G	ENSMUSG00000020932	Gfap	0	0.0260432	0.0260432	1.44135e-07	0.000677951
chr11	102888540	T	C	ENSMUSG00000020932	Gfap	0.00269766	0.0806542	0.0779565	0.000594033	5.10209e-06
chr11	102888545	A	G	ENSMUSG00000020932	Gfap	0.00218818	0.0672649	0.0650767	9.52087e-05	3.28925e-05
chr11	102888661	A	G	ENSMUSG00000020932	Gfap	0.00443081	0.180023	0.175593	0.00560114	1.44309e-08
chr11	102888700	C	T	ENSMUSG00000020932	Gfap	0.0029396	0.0475455	0.0446059	4.89023e-07	0.000176209
chr11	102889447	C	T	ENSMUSG00000020932	Gfap	0	0.0501942	0.0501942	5.27375e-07	9.53954e-06
chr11	102889448	A	G	ENSMUSG00000020932	Gfap	0.0258605	0.242976	0.217116	0.000316164	1.20736e-10
chr11	102889454	A	C	ENSMUSG00000020932	Gfap	0	0.108846	0.108846	0.00117921	2.83301e-08
chr11	102889466	A	G	ENSMUSG00000020932	Gfap	0	0.0848103	0.0848103	0.00117398	4.51279e-10
chr11	102889472	T	C	ENSMUSG00000020932	Gfap	0.00213083	0.116636	0.114505	0.00137213	3.41921e-09
chr11	102891933	A	C	ENSMUSG00000020932	Gfap	0	0.0514945	0.0514945	0.000246503	2.06968e-07
chr11	102893161	T	C	ENSMUSG00000020932	Gfap	0.00734844	0.266506	0.259158	1.08626e-05	4.10844e-11
chr11	102893164	T	C	ENSMUSG00000020932	Gfap	0	0.0453967	0.0453967	3.91491e-05	0.000677951
chr11	102893201	A	G	ENSMUSG00000020932	Gfap	0.0909712	0.450906	0.359934	1.11323e-06	3.53441e-08
chr11	102893208	C	T	ENSMUSG00000020932	Gfap	0	0.0234401	0.0234401	2.2973e-07	0.000677951
chr11	102893209	G	A	ENSMUSG00000020932	Gfap	0	0.0244507	0.0244507	1.23935e-11	0.000372582
chr11	102893510	C	T	ENSMUSG00000020932	Gfap	0.00213961	0.0359395	0.0337999	3.45792e-10	0.000677951
chr11	102894389	A	T	ENSMUSG00000020932	Gfap	0.175007	0.679759	0.504752	0.000783625	1.01015e-05
chr11	102894392	A	G	ENSMUSG00000020932	Gfap	0	0.048018	0.048018	4.82664e-07	0.000111515
chr11	102894514	A	G	ENSMUSG00000020932	Gfap	0.0208891	0.189058	0.168169	1.37708e-07	2.47409e-06
chr11	102895504	T	C	ENSMUSG00000020932	Gfap	0.165945	0.608412	0.442467	0.000773585	4.62571e-07
chr11	102895505	C	T	ENSMUSG00000020932	Gfap	0	0.0407346	0.0407346	9.92326e-09	0.000204172
chr11	102895508	C	T	ENSMUSG00000020932	Gfap	0.00837521	0.220193	0.211817	0.00541752	0.00188551
chr11	102895513	A	G	ENSMUSG00000020932	Gfap	0.0165862	0.188809	0.172223	7.78551e-05	5.9167e-10
chr11	102895766	A	G	ENSMUSG00000020932	Gfap	0	0.0943267	0.0943267	9.73255e-06	0.000677951
chr11	102896837	A	G	ENSMUSG00000020932	Gfap	0.0139543	0.173589	0.159635	1.17798e-06	1.21955e-05
chr11	102896867	A	G	ENSMUSG00000020932	Gfap	0.0161731	0.378374	0.362201	6.86979e-05	6.5022e-14
chr11	102896906	A	G	ENSMUSG00000020932	Gfap	0	0.0640874	0.0640874	4.87296e-13	1.43814e-06
chr11	102896909	A	G	ENSMUSG00000020932	Gfap	0	0.0223821	0.0223821	2.69559e-09	0.000677951
chr11	102896947	A	G	ENSMUSG00000020932	Gfap	0.0255693	0.220766	0.195197	5.03137e-06	0.00395557
chr11	115791857	G	A	ENSMUSG00000020747	Tmem94	2.70933	13.8526	11.1432	0.00149806	6.39014e-05
chr11	120579091	T	C	ENSMUSG00000025132	Arhgdia	0.116965	0.686348	0.569383	2.63955e-07	2.04246e-06
chr11	46272643	T	C	ENSMUSG00000020340	Cyfip2	78.7706	75.1436	-3.62699	2.2081e-17	2.25202e-10
chr11	55110583	A	G	ENSMUSG00000000594	Gm2a	0	0.653006	0.653006	1.11894e-08	0.000111515
chr11	55395207	G	A	ENSMUSG00000018593	Sparc	0.00536769	0.132965	0.127597	2.54503e-06	1.19345e-05
chr11	55395226	G	A	ENSMUSG00000018593	Sparc	0.0164261	0.468317	0.451891	4.94464e-09	4.91554e-07
chr1	172092348	A	G	ENSMUSG00000026553	Copa	5.12674	9.50127	4.37453	7.40501e-15	3.72094e-09
chr11	75176384	T	C	ENSMUSG00000038268	Ovca2	0.433015	2.25448	1.82146	1.01633e-07	0.00525342
chr11	75176432	T	C	ENSMUSG00000038268	Ovca2	16.8849	28.1591	11.2742	3.28019e-10	7.19034e-06
chr11	75177459	T	C	ENSMUSG00000038268	Ovca2	3.84853	8.87476	5.02622	0.000109679	0.00223456
chr11	75301000	T	C	ENSMUSG00000000751	Rpa1	28.2182	32.2448	4.02664	0.000174168	0.00015708
chr11	75301015	T	C	ENSMUSG00000000751	Rpa1	86.7772	90.1262	3.34893	1.83965e-11	6.17864e-06
chr11	78324386	C	A	ENSMUSG00000017390	Aldoc	15.2569	21.1378	5.88089	0.00641823	0.00263809
chr12	31937204	G	A	ENSMUSG00000035933	Cog5	22.085	12.9676	-9.1173	0.00742751	0.00623836
chr13	56289463	T	C	ENSMUSG00000021508	Cxcl14	0.0320391	0.527359	0.495319	2.29811e-05	0.000895369
chr13	58933755	C	T	ENSMUSG00000055254	Ntrk2	0.0214133	0.368644	0.347231	9.72818e-06	8.39996e-05
chr14	12411582	T	C	ENSMUSG00000054423	Cadps	15.3006	18.597	3.29647	2.15567e-13	2.09379e-09
chr14	31700662	T	C	ENSMUSG00000014496	Ankrd28	10.5095	18.2357	7.72614	0.00525623	7.98884e-06
chr14	63142894	C	T	ENSMUSG00000021939	Ctsb	0.0127479	0.472151	0.459403	1.68888e-14	1.37302e-11
chr14	63142919	C	T	ENSMUSG00000021939	Ctsb	0.00132648	0.280785	0.279458	3.30938e-14	1.07277e-07
chr14	63142922	C	T	ENSMUSG00000021939	Ctsb	0.00181428	0.260282	0.258468	1.18071e-14	1.3339e-08
chr14	63142925	C	T	ENSMUSG00000021939	Ctsb	0	0.0944607	0.0944607	1.37124e-10	1.77534e-05
chr14	63142944	C	T	ENSMUSG00000021939	Ctsb	0	0.329941	0.329941	2.02204e-15	9.139e-10
chr14	63143075	C	A	ENSMUSG00000021939	Ctsb	0	0.140626	0.140626	1.497e-09	0.000204172
chr14	63144541	A	G	ENSMUSG00000021939	Ctsb	0.0326633	1.13034	1.09767	0.0054407	6.97928e-05
chr14	64592992	C	T	ENSMUSG00000097545	Mir124a-1hg	49.604	33.7513	-15.8527	0.00372747	0.00914235
chr14	73362639	G	A	ENSMUSG00000022108	Itm2b	0.0473689	0.290114	0.242745	6.63131e-17	1.29241e-06
chr14	73362665	G	A	ENSMUSG00000022108	Itm2b	0.00424732	0.0884006	0.0841533	1.64059e-13	0.000131879
chr14	73362727	G	A	ENSMUSG00000022108	Itm2b	0.00347249	0.0369889	0.0335164	3.96238e-06	0.00161358
chr14	73362822	G	A	ENSMUSG00000022108	Itm2b	0.021729	0.237791	0.216062	7.61848e-22	6.42489e-08
chr14	8298532	T	C	ENSMUSG00000021750	Fam107a	0.0269978	0.198677	0.17168	7.33262e-07	0.00904795
chr14	8298542	T	C	ENSMUSG00000021750	Fam107a	0.024408	0.321656	0.297248	1.11339e-09	0.000677951
chr15	3279914	C	T	ENSMUSG00000064373	Sepp1	0	0.241138	0.241138	2.64812e-14	9.53954e-06
chr15	8634334	G	A	ENSMUSG00000005360	Slc1a3	0.00853497	0.173547	0.165012	1.20552e-10	9.45204e-07
chr15	98804046	A	G	ENSMUSG00000059213	Ddn	0.0836283	0.0347544	-0.0488739	0.00443872	0.000668246
chr15	99408620	C	T	ENSMUSG00000023010	Tmbim6	2.25557	4.91353	2.65796	1.1761e-25	1.63779e-14
chr15	99409832	C	T	ENSMUSG00000023010	Tmbim6	0.00253539	0.0847108	0.0821754	2.33281e-09	0.00494149
chr1	60478588	A	G	ENSMUSG00000026782	Abi2	42.112	37.3793	-4.73262	3.35934e-11	6.54328e-08
chr16	20123748	A	G	ENSMUSG00000062901	Klhl24	36.4667	34.2403	-2.22641	5.59399e-07	0.00344637
chr16	32300332	A	G	ENSMUSG00000014074	Rnf168	26.5644	19.3667	-7.19771	3.65962e-10	5.05098e-05
chr1	66672714	A	G	ENSMUSG00000055567	Unc80	22.5984	19.2896	-3.30882	4.1072e-06	0.00524792
chr17	33928729	A	G	ENSMUSG00000024308	Tapbp	0	1.48055	1.48055	0.00522059	3.28925e-05
chr17	43612118	C	T	ENSMUSG00000023913	Pla2g7	0.0118577	0.954068	0.94221	4.57253e-06	2.71559e-06
chr1	86345911	T	C	ENSMUSG00000026234	Ncl	34.0209	23.5802	-10.4407	1.30497e-06	0.00289748
chr18	82554697	A	G	ENSMUSG00000041607	Mbp	0.0101204	0.033228	0.0231075	3.87502e-05	0.00569607
chr18	82585036	A	G	ENSMUSG00000041607	Mbp	0.00579681	0.0244154	0.0186186	0.00705434	0.00613368
chr19	44303891	C	T	ENSMUSG00000025203	Scd2	0	0.0893436	0.0893436	1.23203e-06	6.06842e-05
chr19	44306154	C	T	ENSMUSG00000025203	Scd2	0.0202561	0.0616102	0.0413541	0.000963098	0.00266002
chr19	45005230	T	C	ENSMUSG00000025208	Mrpl43	9.61636	6.98817	-2.62819	7.81571e-10	0.00160649
chr19	5607788	C	A	ENSMUSG00000024926	Kat5	3.71634	12.0138	8.29748	0.00141236	0.00219533
chr19	6472363	A	C	ENSMUSG00000033768	Nrxn2	2.26934	9.69387	7.42453	0.00515615	0.000117798
chr19	6531914	C	A	ENSMUSG00000052188	Gm14964	1.88906	9.53671	7.64765	0.000440431	0.000478588
chr2	102782107	A	G	ENSMUSG00000005089	Slc1a2	0	0.115384	0.115384	0.00223796	9.53954e-06
chr2	102784323	A	G	ENSMUSG00000005089	Slc1a2	0.595077	1.47861	0.883536	7.22138e-24	8.32715e-06
chr2	102784325	A	G	ENSMUSG00000005089	Slc1a2	0.202255	0.826366	0.624112	3.1466e-17	3.90062e-08
chr2	102784327	A	G	ENSMUSG00000005089	Slc1a2	0.318322	0.982123	0.663801	3.79151e-13	2.55837e-07
chr2	102784329	A	G	ENSMUSG00000005089	Slc1a2	0.468137	1.36486	0.896724	7.38681e-15	4.71407e-07
chr2	102784331	A	G	ENSMUSG00000005089	Slc1a2	0.247604	0.882709	0.635105	2.18802e-17	1.92766e-06
chr2	102784333	A	G	ENSMUSG00000005089	Slc1a2	0.129802	0.620272	0.49047	2.27231e-10	4.43691e-06
chr2	102784335	A	G	ENSMUSG00000005089	Slc1a2	0.324017	0.932926	0.608909	1.39013e-07	5.67068e-05
chr2	102784337	A	G	ENSMUSG00000005089	Slc1a2	0.4558	1.11657	0.660772	2.35212e-05	5.74725e-06
chr2	102784339	A	G	ENSMUSG00000005089	Slc1a2	0.392254	0.864604	0.47235	9.37705e-06	0.000419383
chr2	102784341	A	G	ENSMUSG00000005089	Slc1a2	0.0326865	0.236384	0.203697	0.000503324	0.000136018
chr2	102784382	A	G	ENSMUSG00000005089	Slc1a2	0.403118	1.17501	0.771892	7.12946e-16	4.0635e-06
chr2	102784383	A	G	ENSMUSG00000005089	Slc1a2	0	0.0878107	0.0878107	4.42583e-09	9.53954e-06
chr2	102784860	C	T	ENSMUSG00000005089	Slc1a2	0.097631	0.257272	0.159641	4.05774e-06	3.07107e-06
chr2	102788168	C	T	ENSMUSG00000005089	Slc1a2	0.0683259	0.257915	0.189589	2.29492e-05	1.24956e-05
chr2	102788176	C	T	ENSMUSG00000005089	Slc1a2	1.22554	1.72633	0.500789	1.12014e-08	0.00144118
chr2	102788199	C	T	ENSMUSG00000005089	Slc1a2	0.0160217	0.0883605	0.0723388	0.00519245	0.000625795
chr2	102788208	C	T	ENSMUSG00000005089	Slc1a2	0.0390064	0.166231	0.127225	0.000793517	0.000246959
chr2	102788220	C	T	ENSMUSG00000005089	Slc1a2	0.670151	1.03238	0.362233	5.0642e-09	4.09021e-08
chr2	102788224	C	T	ENSMUSG00000005089	Slc1a2	0.0318775	0.131939	0.100062	0.000278523	2.5856e-05
chr2	102788234	C	T	ENSMUSG00000005089	Slc1a2	0.424882	0.632359	0.207477	1.55321e-05	6.36252e-05
chr2	102788247	C	T	ENSMUSG00000005089	Slc1a2	0.168651	0.365304	0.196653	1.05704e-06	1.42463e-06
chr2	102788255	C	T	ENSMUSG00000005089	Slc1a2	0	0.0412458	0.0412458	2.65334e-05	6.06842e-05
chr2	102788258	C	T	ENSMUSG00000005089	Slc1a2	1.05788	1.69084	0.632966	8.67068e-21	1.44735e-12
chr2	102788289	C	T	ENSMUSG00000005089	Slc1a2	0.0752195	0.231998	0.156779	0.00018069	2.69712e-06
chr2	102788294	C	T	ENSMUSG00000005089	Slc1a2	0.661345	1.01281	0.351463	6.91157e-11	3.3618e-08
chr2	102788447	C	T	ENSMUSG00000005089	Slc1a2	0.0308802	0.103463	0.0725828	0.00165623	0.000261701
chr2	102788912	C	T	ENSMUSG00000005089	Slc1a2	0.00357866	0.0312092	0.0276306	0.00233457	0.00178361
chr2	102789041	C	T	ENSMUSG00000005089	Slc1a2	0.90092	1.46821	0.567293	9.09414e-21	4.63226e-14
chr2	102789050	C	T	ENSMUSG00000005089	Slc1a2	0.0149381	0.107392	0.0924536	2.46435e-06	3.21785e-07
chr2	102789110	C	T	ENSMUSG00000005089	Slc1a2	0.00372441	0.0634819	0.0597575	0.000127726	2.22429e-05
chr2	102789199	C	T	ENSMUSG00000005089	Slc1a2	0.00413533	0.063067	0.0589316	4.02425e-07	3.29482e-06
chr2	102789212	C	T	ENSMUSG00000005089	Slc1a2	0.00875221	0.0506098	0.0418575	4.63026e-05	0.00730671
chr2	102789250	C	T	ENSMUSG00000005089	Slc1a2	0.00405213	0.0453466	0.0412944	7.68821e-06	0.000312744
chr2	102789355	C	T	ENSMUSG00000005089	Slc1a2	0.0519617	0.213263	0.161301	4.09823e-08	5.31209e-10
chr2	102789431	C	T	ENSMUSG00000005089	Slc1a2	0.00123546	0.0389124	0.0376769	5.59123e-05	0.0014916
chr2	120733777	T	C	ENSMUSG00000090100	Ttbk2	25.1801	19.2312	-5.94886	0.000605032	0.00234716
chr2	122152682	C	T	ENSMUSG00000027233	Patl2	0.00459888	0.669345	0.664746	6.3111e-15	7.78819e-10
chr2	122152902	C	T	ENSMUSG00000027233	Patl2	0.56185	5.04931	4.48746	2.65543e-22	1.16187e-12
chr2	131938101	C	T	ENSMUSG00000079037	Prnp	0.000966599	0.0612318	0.0602652	1.04639e-13	0.000129892
chr2	131938269	C	T	ENSMUSG00000079037	Prnp	0.0141261	0.155722	0.141595	7.00727e-13	1.37221e-06
chr2	132309633	A	G	ENSMUSG00000058793	Cds2	2.61222	4.02009	1.40787	1.18095e-18	6.14472e-11
chr2	144540438	A	G	ENSMUSG00000027427	Polr3f	0.126582	1.85789	1.73131	9.60652e-05	0.00164548
chr2	148871892	G	A	ENSMUSG00000027447	Cst3	0.0170289	0.0520191	0.0349903	0.00191956	0.00601657
chr2	148871907	A	T	ENSMUSG00000027447	Cst3	0.0655852	0.128938	0.0633531	0.00165442	0.0052158
chr2	148871915	A	C	ENSMUSG00000027447	Cst3	0.0434287	0.113484	0.0700554	0.000365804	0.000326225
chr2	148872827	T	C	ENSMUSG00000027447	Cst3	0.320022	0.206635	-0.113388	0.000612302	0.00128164
chr2	180161846	T	A	ENSMUSG00000039050	Osbpl2	23.7517	12.8009	-10.9508	0.000761759	0.00262731
chr2	25467318	A	G	ENSMUSG00000015090	Ptgds	0.0115755	0.0601314	0.048556	0.00780584	0.00161358
chr2	25469578	G	C	ENSMUSG00000015090	Ptgds	0.015552	0.0779798	0.0624278	0.00753053	0.000150606
chr2	31030943	T	C	ENSMUSG00000075415	Fnbp1	0.25	2.53482	2.28482	6.40121e-06	0.00174468
chr2	82259146	A	G	ENSMUSG00000070866	Zfp804a	37.581	22.5576	-15.0234	0.00189333	0.00233128
chr2	91213599	G	A	ENSMUSG00000002109	Ddb2	37.2996	23.152	-14.1476	0.0042426	0.00439737
chr3	116744084	T	C	ENSMUSG00000033400	Agl	2.24444	8.04024	5.7958	0.00402574	6.93836e-05
chr3	116744097	T	C	ENSMUSG00000033400	Agl	3.00391	14.0782	11.0743	1.93883e-09	7.88427e-08
chr3	135406870	T	C	ENSMUSG00000028165	Cisd2	15.7732	12.4404	-3.33284	2.96079e-06	0.000788307
chr3	40793194	A	G	ENSMUSG00000025757	Hspa4l	29.6245	23.2842	-6.34035	0.00424442	0.004636
chr3	58590823	A	G	ENSMUSG00000075700	Selt	0.47498	1.7156	1.24062	2.93053e-10	1.37726e-08
chr3	80706649	T	C	ENSMUSG00000033981	Gria2	10.5727	22.0193	11.4466	1.93317e-05	0.0070016
chr3	80706908	T	C	ENSMUSG00000033981	Gria2	17.3304	16.2381	-1.09228	0.00384911	0.00678256
chr3	95556296	C	T	ENSMUSG00000038642	Ctss	0	0.240941	0.240941	4.28765e-05	6.06842e-05
chr3	96632460	A	G	ENSMUSG00000038374	Rbm8a	67.4849	73.9566	6.47163	2.13957e-06	1.67041e-05
chr4	138456831	G	A	ENSMUSG00000046447	Camk2n1	0.104523	0.0371221	-0.067401	0.008776	0.00373266
chr4	141858629	A	G	ENSMUSG00000040659	Efhd2	17.9073	28.1162	10.2089	0.0083479	0.0090205
chr4	148166296	C	T	ENSMUSG00000041556	Fbxo2	1.99364	8.44363	6.44999	2.48813e-35	2.25002e-20
chr4	33020417	A	G	ENSMUSG00000028278	Rragd	36.0401	33.9293	-2.11076	1.06031e-06	0.000287561
chr4	4133993	A	G	ENSMUSG00000045573	Penk	0	1.14562	1.14562	0.00105359	5.22373e-11
chr5	104079353	G	A	ENSMUSG00000029309	Sparcl1	0.420562	0.803093	0.38253	8.45282e-16	3.60533e-10
chr5	104079367	G	A	ENSMUSG00000029309	Sparcl1	0.0164837	0.163837	0.147354	2.24139e-12	7.83359e-09
chr5	104079378	G	A	ENSMUSG00000029309	Sparcl1	0.122064	0.349932	0.227868	3.72748e-12	1.51579e-08
chr5	104079408	G	A	ENSMUSG00000029309	Sparcl1	0.0723562	0.195964	0.123607	5.2005e-08	1.03479e-07
chr5	104079461	G	A	ENSMUSG00000029309	Sparcl1	0.00871825	0.0462679	0.0375496	1.92463e-05	0.000109306
chr5	104079465	G	A	ENSMUSG00000029309	Sparcl1	0	0.030487	0.030487	0.00148659	6.06842e-05
chr5	104079470	G	A	ENSMUSG00000029309	Sparcl1	0.0025931	0.0236043	0.0210112	0.00014195	0.00480202
chr5	104079472	G	A	ENSMUSG00000029309	Sparcl1	0.0518539	0.192237	0.140383	4.81613e-09	4.32019e-08
chr5	104079485	G	A	ENSMUSG00000029309	Sparcl1	0.248835	0.707504	0.458669	2.47074e-41	9.95207e-19
chr5	113087988	T	C	ENSMUSG00000051339	2900026A02Rik	11.0663	6.93602	-4.13029	0.00235416	0.00784327
chr5	113088007	T	C	ENSMUSG00000051339	2900026A02Rik	16.271	10.7006	-5.57045	1.80216e-07	0.00011054
chr5	125456623	A	G	ENSMUSG00000037905	Bri3bp	3.66596	1.79167	-1.87429	0.00191094	0.00492869
chr5	125456906	A	G	ENSMUSG00000037905	Bri3bp	7.73942	4.60051	-3.1389	0.00393937	0.00726232
chr5	125457477	A	G	ENSMUSG00000037905	Bri3bp	29.0501	23.3654	-5.68471	1.57092e-10	6.24785e-07
chr5	134221084	G	A	ENSMUSG00000015950	Ncf1	9.33773	24.6731	15.3354	0.00866961	0.00105778
chr5	134246867	G	A	ENSMUSG00000060261	Gtf2i	19.6722	31.0603	11.3881	0.00309299	0.00455357
chr5	135909342	T	C	ENSMUSG00000051391	Ywhag	0.0324683	0.0796912	0.0472228	0.00234711	0.00791718
chr5	142669292	A	G	ENSMUSG00000029578	Wipi2	14.6483	12.2904	-2.35789	8.42138e-06	0.00066119
chr5	142870076	T	C		NA	34.3191	23.8381	-10.481	0.00197718	0.00220071
chr5	65448045	T	C	ENSMUSG00000037822	Smim14	15.0038	13.0026	-2.00123	0.00113067	0.00215102
chr5	65448046	T	C	ENSMUSG00000037822	Smim14	29.1128	24.7024	-4.41037	4.74153e-11	0.00078571
chr5	91624470	G	A	ENSMUSG00000034981	Parm1	7.12275	3.90067	-3.22208	0	0.00652145
chr5	96073154	C	A		NA	20.194	10.697	-9.49699	0.00961855	0.00715662
chr6	36715447	G	A		NA	0.0124299	0.136579	0.124149	3.48768e-09	6.02922e-06
chr6	39335154	T	C	ENSMUSG00000029924	Slc37a3	11.8656	6.90534	-4.96025	1.26939e-06	0.00117157
chr7	142376301	A	G	ENSMUSG00000007891	Ctsd	0.00344037	0.0634189	0.0599785	0.000613879	0.00161358
chr7	142653273	T	C	ENSMUSG00000048583	Igf2	8.95539	13.839	4.8836	9.53969e-05	1.74909e-05
chr7	19696399	A	G	ENSMUSG00000002985	Apoe	0.0965911	0.196001	0.0994096	0.000350029	0.00614442
chr7	19696401	T	C	ENSMUSG00000002985	Apoe	0.0585004	0.139766	0.0812656	0.00221041	7.11716e-05
chr7	19696996	A	G	ENSMUSG00000002985	Apoe	0.877999	0.737594	-0.140405	0.000588621	0.000708
chr7	19697066	A	C	ENSMUSG00000002985	Apoe	0.0053725	0.0326082	0.0272357	0.000403667	0.00175238
chr7	19697085	A	T	ENSMUSG00000002985	Apoe	0.0165374	0.0570347	0.0404973	0.00496271	0.00634094
chr7	19697616	T	C	ENSMUSG00000002985	Apoe	0.0253747	0.076133	0.0507583	0.000390788	4.1334e-05
chr8	55060535	C	T	ENSMUSG00000031517	Gpm6a	0.00802065	0.0625234	0.0545027	1.50556e-05	0.00456066
chr8	64592664	G	A	ENSMUSG00000037852	Cpe	0.0203544	0.112385	0.0920308	7.83082e-13	7.31362e-10
chr8	64592681	G	A	ENSMUSG00000037852	Cpe	0.00132582	0.0234865	0.0221607	8.87253e-12	0.000500585
chr8	64592738	G	A	ENSMUSG00000037852	Cpe	0.00476789	0.0241338	0.0193659	7.32653e-06	0.00533488
chr8	64592765	G	A	ENSMUSG00000037852	Cpe	0.0182258	0.185152	0.166926	4.48797e-24	9.79829e-14
chr8	64592767	G	A	ENSMUSG00000037852	Cpe	0.0284445	0.112871	0.0844264	2.38201e-14	1.22581e-07
chr8	64592779	G	A	ENSMUSG00000037852	Cpe	0.0409411	0.153439	0.112498	4.04084e-15	2.7234e-10
chr8	64592787	G	A	ENSMUSG00000037852	Cpe	0.00735395	0.0290994	0.0217455	0.000280441	0.00257095
chr8	64592801	G	A	ENSMUSG00000037852	Cpe	0.0126282	0.0364973	0.0238691	0.000264941	0.00692036
chr8	64592810	G	A	ENSMUSG00000037852	Cpe	0.0636358	0.230565	0.16693	2.60338e-27	3.40219e-09
chr8	64592827	G	A	ENSMUSG00000037852	Cpe	0.0319295	0.152243	0.120313	1.99209e-18	2.67896e-07
chr8	64592834	G	A	ENSMUSG00000037852	Cpe	0.0229945	0.111803	0.0888087	7.38878e-18	2.38263e-08
chr8	64592853	G	A	ENSMUSG00000037852	Cpe	0.0215356	0.0555602	0.0340246	6.43772e-05	0.00134803
chr8	64592914	G	A	ENSMUSG00000037852	Cpe	0.00703286	0.0303216	0.0232888	4.64071e-07	0.00196468
chr8	64592925	G	A	ENSMUSG00000037852	Cpe	0.0463933	0.107545	0.0611513	2.03589e-08	0.00171683
chr8	64592929	G	A	ENSMUSG00000037852	Cpe	0.0485545	0.173887	0.125333	8.53145e-23	1.07061e-09
chr8	64592932	G	A	ENSMUSG00000037852	Cpe	0.00913423	0.0559079	0.0467737	3.44374e-07	4.4929e-05
chr8	64592935	G	A	ENSMUSG00000037852	Cpe	0.0136543	0.0822708	0.0686165	8.45926e-12	1.29637e-05
chr8	64592939	G	A	ENSMUSG00000037852	Cpe	0.0726185	0.234053	0.161434	1.21425e-25	9.00132e-06
chr8	64592943	G	A	ENSMUSG00000037852	Cpe	0.0417434	0.120917	0.0791741	1.58235e-09	0.000332199
chr8	64592946	G	A	ENSMUSG00000037852	Cpe	0.0567868	0.21812	0.161333	2.22413e-22	0.000810019
chr8	64592949	G	A	ENSMUSG00000037852	Cpe	0.00318228	0.0190614	0.0158792	0.000140401	0.00832838
chr8	64592985	G	A	ENSMUSG00000037852	Cpe	0.192353	0.499348	0.306995	1.75994e-31	6.85596e-15
chr8	64592987	G	A	ENSMUSG00000037852	Cpe	0.0133619	0.0705839	0.057222	7.23064e-08	0.00066539
chr8	64593009	G	A	ENSMUSG00000037852	Cpe	0.0711745	0.171169	0.0999947	2.5558e-13	1.72744e-09
chr8	64593061	G	A	ENSMUSG00000037852	Cpe	0.246912	0.360574	0.113662	9.67749e-16	2.37926e-07
chr8	64593084	G	A	ENSMUSG00000037852	Cpe	0.0306906	0.126898	0.0962069	1.3394e-12	1.07711e-05
chr8	64593095	G	A	ENSMUSG00000037852	Cpe	0.00286123	0.0246065	0.0217452	5.54908e-10	0.000945237
chr8	64606694	A	G	ENSMUSG00000037852	Cpe	0.0100281	0.0420299	0.0320018	0.00648778	0.000169704
chr8	64611382	G	C	ENSMUSG00000037852	Cpe	0.057918	0.109686	0.0517678	0.000734745	0.00823658
chr8	64617629	A	G	ENSMUSG00000037852	Cpe	0.184698	0.149991	-0.0347073	0.00268368	0.00640847
chr8	95346566	C	A	ENSMUSG00000031792	Usb1	0.864035	6.7222	5.85816	0.00142813	0.00282716
chr9	106895332	A	C	ENSMUSG00000039716	Dock3	11.2285	4.79145	-6.43708	0.00237683	0.00773501
chrX	150984618	T	C	ENSMUSG00000025266	Gnl3l	37.4222	34.312	-3.11021	4.56501e-05	0.000174602
chrX	150985454	T	C	ENSMUSG00000025266	Gnl3l	15.5206	13.6704	-1.85021	4.60686e-05	5.99845e-06
chrX	150985529	T	C	ENSMUSG00000025266	Gnl3l	28.7447	27.0601	-1.68465	1.87657e-05	0.00843867
chrX	166385743	C	T	ENSMUSG00000031342	Gpm6b	0.27919	0.916992	0.637802	4.7027e-15	4.08802e-10
chrX	166386374	C	T	ENSMUSG00000031342	Gpm6b	0.0107502	0.0689486	0.0581984	5.70303e-07	0.00832838
chrX	166387281	C	T	ENSMUSG00000031342	Gpm6b	0.0059799	0.0929843	0.0870044	1.59592e-07	5.65599e-06
chrX	166387882	C	T	ENSMUSG00000031342	Gpm6b	0.0384844	0.271858	0.233373	7.74911e-14	7.54928e-09
chrX	166387925	A	G	ENSMUSG00000031342	Gpm6b	0.218226	0.967739	0.749513	1.42792e-32	4.40646e-09
chrX	166387973	C	T	ENSMUSG00000031342	Gpm6b	0.353417	0.772935	0.419518	7.95603e-15	9.58896e-10
chrX	166388182	C	T	ENSMUSG00000031342	Gpm6b	0.0048833	0.042547	0.0376637	9.79065e-11	0.00163243
chrX	166388473	C	T	ENSMUSG00000031342	Gpm6b	0.00915183	0.0778625	0.0687107	9.96136e-08	4.74472e-05
chrX	166388732	C	T	ENSMUSG00000031342	Gpm6b	0.00408955	0.0622002	0.0581107	1.75996e-06	0.000788342
chrX	166388833	C	T	ENSMUSG00000031342	Gpm6b	0.00668333	0.129689	0.123006	1.22477e-11	0.000259438
chrX	166388904	C	T	ENSMUSG00000031342	Gpm6b	0.00670017	0.116264	0.109564	3.98083e-11	0.00155149
chrX	56587643	T	C	ENSMUSG00000061273	Mmgt1	5.06913	13.1092	8.04005	5.5686e-15	3.27301e-07
chrX	81096535	C	T	ENSMUSG00000025666	Tmem47	0.00840336	0.384491	0.376088	1.0013e-05	0.000443835

## Sheet: Sheet1
Ensemble gene id	Gene Symbol					Mouse Ensembl Gene ID	Ensembl Gene ID	Homology Type						T	C
ENSMUSG00000069515	Lyz1					ENSMUSG00000031343	ENSG00000011677	ortholog_one2one	#N/A					A	G
ENSMUSG00000006736	Tspan31					ENSMUSG00000031342	ENSG00000046653	ortholog_one2one	#N/A					C	T
ENSMUSG00000056073	Grik2					ENSMUSG00000033793	ENSG00000047249	ortholog_one2one	ENSMUSG00000033793					T	C
ENSMUSG00000019916	P4ha1					ENSMUSG00000020340	ENSG00000055163	ortholog_one2one	ENSMUSG00000020340					A	G
ENSMUSG00000058297	Spock2					ENSMUSG00000033419	ENSG00000065609	ortholog_one2one	ENSMUSG00000033419					A	G
ENSMUSG00000012819	Cdh23					ENSMUSG00000032599	ENSG00000068745	ortholog_one2one	#N/A					T	C
ENSMUSG00000012819	Cdh23					ENSMUSG00000015222	ENSG00000078018	ortholog_one2one	#N/A					T	C
ENSMUSG00000033307	Mif					ENSMUSG00000027447	ENSG00000101439	ortholog_one2one	ENSMUSG00000027447					T	C
ENSMUSG00000035397	Klf16					ENSMUSG00000022010	ENSG00000102804	ortholog_one2one	ENSMUSG00000022010					A	G
ENSMUSG00000020248	Nfyb					ENSMUSG00000036564	ENSG00000103034	ortholog_one2one	ENSMUSG00000036564					A	G
ENSMUSG00000054027	Nt5dc3					ENSMUSG00000017390	ENSG00000109107	ortholog_one2one	ENSMUSG00000017390					A	C
ENSMUSG00000054027	Nt5dc3					ENSMUSG00000037852	ENSG00000109472	ortholog_one2one	ENSMUSG00000037852					G	A
ENSMUSG00000020059	Sycp3					ENSMUSG00000005089	ENSG00000110436	ortholog_one2one	ENSMUSG00000005089					A	C
ENSMUSG00000020059	Sycp3					ENSMUSG00000019877	ENSG00000111897	ortholog_one2one	#N/A					T	C
ENSMUSG00000020059	Sycp3					ENSMUSG00000018593	ENSG00000113140	ortholog_one2one	ENSMUSG00000018593					A	G
ENSMUSG00000020932	Gfap					ENSMUSG00000026696	ENSG00000117533	ortholog_one2one	#N/A					T	C
ENSMUSG00000020932	Gfap					ENSMUSG00000033981	ENSG00000120251	ortholog_one2one	ENSMUSG00000033981					A	G
ENSMUSG00000020932	Gfap					ENSMUSG00000059456	ENSG00000120899	ortholog_one2one	ENSMUSG00000059456					C	T
ENSMUSG00000020932	Gfap					ENSMUSG00000023004	ENSG00000123416	ortholog_one2one	ENSMUSG00000023004					A	G
ENSMUSG00000020932	Gfap					ENSMUSG00000060126	ENSG00000133112	ortholog_one2one	#N/A					T	C
ENSMUSG00000020932	Gfap					ENSMUSG00000022108	ENSG00000136156	ortholog_one2one	ENSMUSG00000022108					T	C
ENSMUSG00000020932	Gfap					ENSMUSG00000025290	ENSG00000138326	ortholog_one2one	ENSMUSG00000025290					C	T
ENSMUSG00000020932	Gfap					ENSMUSG00000034724	ENSG00000138767	ortholog_one2one	ENSMUSG00000034724					C	T
ENSMUSG00000020932	Gfap					ENSMUSG00000028161	ENSG00000138814	ortholog_one2one	ENSMUSG00000028161					T	C
ENSMUSG00000020932	Gfap					ENSMUSG00000023010	ENSG00000139644	ortholog_one2one	ENSMUSG00000023010					A	G
ENSMUSG00000020932	Gfap					ENSMUSG00000003429	ENSG00000142534	ortholog_one2one	#N/A					T	C
ENSMUSG00000020932	Gfap					ENSMUSG00000062083	ENSG00000142541	ortholog_one2many	#N/A					A	G
ENSMUSG00000020932	Gfap					ENSMUSG00000074129	ENSG00000142541	ortholog_one2many	#N/A					A	G
ENSMUSG00000020932	Gfap					ENSMUSG00000026576	ENSG00000143153	ortholog_one2one	ENSMUSG00000026576					C	T
ENSMUSG00000020932	Gfap					ENSMUSG00000022658	ENSG00000144834	ortholog_one2one	ENSMUSG00000022658					C	T
ENSMUSG00000020932	Gfap					ENSMUSG00000022354	ENSG00000147684	ortholog_one2one	ENSMUSG00000022354					A	G
ENSMUSG00000020932	Gfap					ENSMUSG00000031517	ENSG00000150625	ortholog_one2one	ENSMUSG00000031517					A	C
ENSMUSG00000020932	Gfap					ENSMUSG00000029309	ENSG00000152583	ortholog_one2one	ENSMUSG00000029309					A	G
ENSMUSG00000020932	Gfap					ENSMUSG00000037742	ENSG00000156508	ortholog_one2one	#N/A					T	C
ENSMUSG00000020932	Gfap					ENSMUSG00000032336	ENSG00000156642	ortholog_one2one	ENSMUSG00000032336					A	C
ENSMUSG00000020932	Gfap					ENSMUSG00000046447	ENSG00000162545	ortholog_one2one	ENSMUSG00000046447					T	C
ENSMUSG00000020932	Gfap					ENSMUSG00000037822	ENSG00000163683	ortholog_one2one	ENSMUSG00000037822					T	C
ENSMUSG00000020932	Gfap					ENSMUSG00000027533	ENSG00000164687	ortholog_one2one	ENSMUSG00000027533					A	G
ENSMUSG00000020932	Gfap					ENSMUSG00000060802	ENSG00000166710	ortholog_one2one	#N/A					C	T
ENSMUSG00000020932	Gfap					ENSMUSG00000051391	ENSG00000170027	ortholog_one2one	ENSMUSG00000051391					G	A
ENSMUSG00000020932	Gfap					ENSMUSG00000079037	ENSG00000171867	ortholog_one2one	ENSMUSG00000079037					C	T
ENSMUSG00000020932	Gfap					ENSMUSG00000074269	ENSG00000183324	ortholog_one2one	#N/A					A	T
ENSMUSG00000020932	Gfap					ENSMUSG00000004207	ENSG00000197746	ortholog_one2one	#N/A					A	G
ENSMUSG00000020932	Gfap					ENSMUSG00000075700	ENSG00000198843	ortholog_one2one	ENSMUSG00000075700					A	G
ENSMUSG00000020932	Gfap					ENSMUSG00000024387	ENSG00000204435	ortholog_one2one	ENSMUSG00000024387					T	C
ENSMUSG00000020932	Gfap						ENSG00000218537		#N/A					C	T
ENSMUSG00000020932	Gfap					ENSMUSG00000033307	ENSG00000240972	ortholog_one2one	ENSMUSG00000033307					C	T
ENSMUSG00000020932	Gfap						ENSG00000249348		#N/A					A	G
ENSMUSG00000020932	Gfap						ENSG00000251357		#N/A					A	G
ENSMUSG00000020932	Gfap						ENSG00000251405		#N/A					A	G
ENSMUSG00000020932	Gfap						ENSG00000258017		#N/A					A	G
ENSMUSG00000020932	Gfap					ENSMUSG00000002055	ENSG00000258472	ortholog_one2many	#N/A					A	G
ENSMUSG00000020932	Gfap					ENSMUSG00000043807	ENSG00000263020	ortholog_one2many	#N/A					A	G
ENSMUSG00000020932	Gfap						ENSG00000263738		#N/A					A	G
ENSMUSG00000020932	Gfap						ENSG00000265168		#N/A					G	A
ENSMUSG00000020932	Gfap						ENSG00000273149		#N/A					T	C
ENSMUSG00000020932	Gfap													T	C
ENSMUSG00000020932	Gfap													A	G
ENSMUSG00000020932	Gfap													G	A
ENSMUSG00000020932	Gfap													G	A
ENSMUSG00000020932	Gfap													A	G
ENSMUSG00000020932	Gfap													T	C
ENSMUSG00000020932	Gfap													T	C
ENSMUSG00000020932	Gfap													T	C
ENSMUSG00000020932	Gfap													T	C
ENSMUSG00000020932	Gfap													T	C
ENSMUSG00000020932	Gfap													C	A
ENSMUSG00000020932	Gfap													G	A
ENSMUSG00000020932	Gfap													T	C
ENSMUSG00000020932	Gfap													C	T
ENSMUSG00000020932	Gfap													T	C
ENSMUSG00000020932	Gfap													T	C
ENSMUSG00000020932	Gfap													C	T
ENSMUSG00000020932	Gfap													C	T
ENSMUSG00000020932	Gfap													C	T
ENSMUSG00000020932	Gfap													C	T
ENSMUSG00000020932	Gfap													C	T
ENSMUSG00000020932	Gfap													C	A
ENSMUSG00000020932	Gfap													A	G
ENSMUSG00000020932	Gfap													C	T
ENSMUSG00000020932	Gfap													G	A
ENSMUSG00000020932	Gfap													G	A
ENSMUSG00000020932	Gfap													G	A
ENSMUSG00000020932	Gfap													G	A
ENSMUSG00000020932	Gfap													T	C
ENSMUSG00000020932	Gfap													T	C
ENSMUSG00000020932	Gfap													C	T
ENSMUSG00000020932	Gfap													G	A
ENSMUSG00000020932	Gfap													A	G
ENSMUSG00000020932	Gfap													C	T
ENSMUSG00000020932	Gfap													C	T
ENSMUSG00000020932	Gfap													A	G
ENSMUSG00000020932	Gfap													A	G
ENSMUSG00000020932	Gfap													A	G
ENSMUSG00000020932	Gfap													A	G
ENSMUSG00000020932	Gfap													A	G
ENSMUSG00000020932	Gfap													C	T
ENSMUSG00000020932	Gfap													T	C
ENSMUSG00000020932	Gfap													A	G
ENSMUSG00000020932	Gfap													A	G
ENSMUSG00000020932	Gfap													C	T
ENSMUSG00000020932	Gfap													C	T
ENSMUSG00000020932	Gfap													T	C
ENSMUSG00000020932	Gfap													C	A
ENSMUSG00000020932	Gfap													A	C
ENSMUSG00000020932	Gfap													C	A
ENSMUSG00000020932	Gfap													A	G
ENSMUSG00000020932	Gfap													A	G
ENSMUSG00000020932	Gfap													A	G
ENSMUSG00000020932	Gfap													A	G
ENSMUSG00000020932	Gfap													A	G
ENSMUSG00000020932	Gfap													A	G
ENSMUSG00000020932	Gfap													A	G
ENSMUSG00000020932	Gfap													A	G
ENSMUSG00000020932	Gfap													A	G
ENSMUSG00000020932	Gfap													A	G
ENSMUSG00000020932	Gfap													A	G
ENSMUSG00000020932	Gfap													A	G
ENSMUSG00000020932	Gfap													A	G
ENSMUSG00000020932	Gfap													C	T
ENSMUSG00000020932	Gfap													C	T
ENSMUSG00000020932	Gfap													C	T
ENSMUSG00000020932	Gfap													C	T
ENSMUSG00000020932	Gfap													C	T
ENSMUSG00000020932	Gfap													C	T
ENSMUSG00000020932	Gfap													C	T
ENSMUSG00000020932	Gfap													C	T
ENSMUSG00000020932	Gfap													C	T
ENSMUSG00000020932	Gfap													C	T
ENSMUSG00000020932	Gfap													C	T
ENSMUSG00000020932	Gfap													C	T
ENSMUSG00000020932	Gfap													C	T
ENSMUSG00000020932	Gfap													C	T
ENSMUSG00000020932	Gfap													C	T
ENSMUSG00000020932	Gfap													C	T
ENSMUSG00000020932	Gfap													C	T
ENSMUSG00000020932	Gfap													C	T
ENSMUSG00000020932	Gfap													C	T
ENSMUSG00000020932	Gfap													C	T
ENSMUSG00000020932	Gfap													C	T
ENSMUSG00000020932	Gfap													C	T
ENSMUSG00000020932	Gfap													C	T
ENSMUSG00000020932	Gfap													T	C
ENSMUSG00000020932	Gfap													C	T
ENSMUSG00000020932	Gfap													C	T
ENSMUSG00000020932	Gfap													C	T
ENSMUSG00000020932	Gfap													C	T
ENSMUSG00000020932	Gfap													A	G
ENSMUSG00000020932	Gfap													A	G
ENSMUSG00000020932	Gfap													G	A
ENSMUSG00000020932	Gfap													A	T
ENSMUSG00000020932	Gfap													A	C
ENSMUSG00000020932	Gfap													T	C
ENSMUSG00000020932	Gfap													T	A
ENSMUSG00000020932	Gfap													A	G
ENSMUSG00000020932	Gfap													G	C
ENSMUSG00000020932	Gfap													T	C
ENSMUSG00000020932	Gfap													A	G
ENSMUSG00000020932	Gfap													G	A
ENSMUSG00000020932	Gfap													T	C
ENSMUSG00000020932	Gfap													T	C
ENSMUSG00000020932	Gfap													T	C
ENSMUSG00000020932	Gfap													A	G
ENSMUSG00000020932	Gfap													A	G
ENSMUSG00000020932	Gfap													T	C
ENSMUSG00000020932	Gfap													T	C
ENSMUSG00000020932	Gfap													C	T
ENSMUSG00000020932	Gfap													A	G
ENSMUSG00000020932	Gfap													G	A
ENSMUSG00000020932	Gfap													A	G
ENSMUSG00000093539	Gm22564													C	T
ENSMUSG00000025132	Arhgdia													A	G
ENSMUSG00000082286	Pisd-ps1													A	G
ENSMUSG00000082286	Pisd-ps1													G	A
ENSMUSG00000082286	Pisd-ps1													G	A
ENSMUSG00000020340	Cyfip2													G	A
ENSMUSG00000000594	Gm2a													G	A
ENSMUSG00000018593	Sparc													G	A
ENSMUSG00000018593	Sparc													G	A
ENSMUSG00000085882	2610507I01Rik													G	A
ENSMUSG00000010086	Rnf112													G	A
ENSMUSG00000020456	Ogdh													G	A
ENSMUSG00000026576	Atp1b1													T	C
ENSMUSG00000018474	Chd3													T	C
ENSMUSG00000026656	Fcgr2b													A	G
ENSMUSG00000026553	Copa													A	G
ENSMUSG00000038268	Ovca2													A	G
ENSMUSG00000038268	Ovca2													G	A
ENSMUSG00000038268	Ovca2													G	A
ENSMUSG00000000751	Rpa1													T	C
ENSMUSG00000000751	Rpa1													A	G
ENSMUSG00000017390	Aldoc													T	C
ENSMUSG00000038013	Wipf2													T	C
ENSMUSG00000066361	Serpina3c													T	C
ENSMUSG00000066363	Serpina3f													G	A
ENSMUSG00000041481	Serpina3g													C	A
ENSMUSG00000021091	Serpina3n													G	A
ENSMUSG00000021091	Serpina3n													T	C
ENSMUSG00000035933	Cog5													A	G
ENSMUSG00000020668	Kif3c													T	C
ENSMUSG00000020668	Kif3c													A	G
-														T	C
-														A	G
-														A	C
-														A	T
ENSMUSG00000054728	Phactr1													T	C
ENSMUSG00000025876	Unc5a													C	T
ENSMUSG00000021508	Cxcl14													G	A
ENSMUSG00000055254	Ntrk2													G	A
-														G	A
-														G	A
-														G	A
-														G	A
-														G	A
-														G	A
-														G	A
-														G	A
ENSMUSG00000069208	Zfp825													G	A
ENSMUSG00000069208	Zfp825													G	A
ENSMUSG00000054423	Cadps													G	A
ENSMUSG00000021774	Ube2e1													G	A
ENSMUSG00000025290	Rps24													G	A
ENSMUSG00000014496	Ankrd28													G	A
ENSMUSG00000041534	Rbp3													G	A
ENSMUSG00000021939	Ctsb													G	A
ENSMUSG00000021939	Ctsb													G	A
ENSMUSG00000021939	Ctsb													G	A
ENSMUSG00000021939	Ctsb													G	A
ENSMUSG00000021939	Ctsb													G	A
ENSMUSG00000021939	Ctsb													G	A
ENSMUSG00000021939	Ctsb													G	A
ENSMUSG00000092972	Mir3078													G	A
ENSMUSG00000059456	Ptk2b													G	A
ENSMUSG00000022108	Itm2b													G	A
ENSMUSG00000022108	Itm2b													A	G
ENSMUSG00000022108	Itm2b													G	C
ENSMUSG00000022108	Itm2b													A	G
ENSMUSG00000068015	Lrch1													C	A
ENSMUSG00000021998	Lcp1													A	C
ENSMUSG00000021998	Lcp1													T	C
ENSMUSG00000021998	Lcp1													T	C
ENSMUSG00000085829	Gm4285													T	C
ENSMUSG00000085829	Gm4285													C	T
ENSMUSG00000085829	Gm4285													C	T
ENSMUSG00000022010	Tsc22d1													C	T
ENSMUSG00000021750	Fam107a													C	T
ENSMUSG00000021750	Fam107a													A	G
ENSMUSG00000033793	Atp6v1h													C	T
ENSMUSG00000033793	Atp6v1h													C	T
ENSMUSG00000091119	Ccdc152													C	T
ENSMUSG00000096141	Dnah7a													C	T
ENSMUSG00000022354	Ndufb9													C	T
ENSMUSG00000047921	Trappc9													C	T
ENSMUSG00000022602	Arc													T	C
ENSMUSG00000005360	Slc1a3													C	T
ENSMUSG00000097414	B130046B21Rik
ENSMUSG00000023004	Tuba1b
ENSMUSG00000023004	Tuba1b
ENSMUSG00000037570	Mcrs1
ENSMUSG00000023010	Tmbim6
ENSMUSG00000023010	Tmbim6
ENSMUSG00000026782	Abi2
ENSMUSG00000050761	Gp1bb
ENSMUSG00000062901	Klhl24
ENSMUSG00000014074	Rnf168
ENSMUSG00000022658	Tagln3
ENSMUSG00000065694	Gm25411
ENSMUSG00000055567	Unc80
ENSMUSG00000060475	Wtap
ENSMUSG00000078546	2210404O09Rik
ENSMUSG00000078546	2210404O09Rik
ENSMUSG00000096433	Gm4944
ENSMUSG00000096433	Gm4944
ENSMUSG00000096433	Gm4944
ENSMUSG00000024308	Tapbp
ENSMUSG00000015451	C4a
ENSMUSG00000024387	Csnk2b
ENSMUSG00000040140	Tdrd6
ENSMUSG00000002668	Dennd1c
ENSMUSG00000024411	Aqp4
ENSMUSG00000038418	Egr1
ENSMUSG00000026234	Ncl
ENSMUSG00000064844	Gm26202
ENSMUSG00000041607	Mbp
ENSMUSG00000041607	Mbp
ENSMUSG00000036103	Colec12
ENSMUSG00000036103	Colec12
ENSMUSG00000025203	Scd2
ENSMUSG00000025203	Scd2
ENSMUSG00000025208	Mrpl43
ENSMUSG00000024926	Kat5
ENSMUSG00000033768	Nrxn2
ENSMUSG00000052188	Gm14964
ENSMUSG00000005089	Slc1a2
ENSMUSG00000005089	Slc1a2
ENSMUSG00000005089	Slc1a2
ENSMUSG00000005089	Slc1a2
ENSMUSG00000005089	Slc1a2
ENSMUSG00000005089	Slc1a2
ENSMUSG00000005089	Slc1a2
ENSMUSG00000005089	Slc1a2
ENSMUSG00000005089	Slc1a2
ENSMUSG00000005089	Slc1a2
ENSMUSG00000005089	Slc1a2
ENSMUSG00000005089	Slc1a2
ENSMUSG00000005089	Slc1a2
ENSMUSG00000005089	Slc1a2
ENSMUSG00000005089	Slc1a2
ENSMUSG00000005089	Slc1a2
ENSMUSG00000005089	Slc1a2
ENSMUSG00000005089	Slc1a2
ENSMUSG00000005089	Slc1a2
ENSMUSG00000005089	Slc1a2
ENSMUSG00000005089	Slc1a2
ENSMUSG00000005089	Slc1a2
ENSMUSG00000005089	Slc1a2
ENSMUSG00000005089	Slc1a2
ENSMUSG00000005089	Slc1a2
ENSMUSG00000005089	Slc1a2
ENSMUSG00000005089	Slc1a2
ENSMUSG00000005089	Slc1a2
ENSMUSG00000005089	Slc1a2
ENSMUSG00000005089	Slc1a2
ENSMUSG00000005089	Slc1a2
ENSMUSG00000005089	Slc1a2
ENSMUSG00000005089	Slc1a2
ENSMUSG00000005089	Slc1a2
ENSMUSG00000005089	Slc1a2
ENSMUSG00000005089	Slc1a2
ENSMUSG00000005089	Slc1a2
ENSMUSG00000090100	Ttbk2
ENSMUSG00000060227	Casc4
ENSMUSG00000027233	B2M
ENSMUSG00000027233	B2M
ENSMUSG00000079037	Prnp
ENSMUSG00000079037	Prnp
ENSMUSG00000079037	Prnp
ENSMUSG00000058793	Cds2
ENSMUSG00000027273	Snap25
ENSMUSG00000027427	Polr3f
ENSMUSG00000027447	Cst3
ENSMUSG00000027447	Cst3
ENSMUSG00000027447	Cst3
ENSMUSG00000027447	Cst3
ENSMUSG00000027455	Nsfl1c
ENSMUSG00000044349	Snhg11
ENSMUSG00000039050	Osbpl2
ENSMUSG00000015090	Ptgds
ENSMUSG00000015090	Ptgds
ENSMUSG00000015090	Ptgds
ENSMUSG00000015090	Ptgds
ENSMUSG00000015090	Ptgds
ENSMUSG00000015090	Ptgds
ENSMUSG00000075415	Fnbp1
ENSMUSG00000026825	Dnm1
ENSMUSG00000026825	Dnm1
ENSMUSG00000026646	Suv39h2
ENSMUSG00000064329	Scn1a
ENSMUSG00000027014	Cwc22
ENSMUSG00000027014	Cwc22
ENSMUSG00000027014	Cwc22
ENSMUSG00000070866	Zfp804a
ENSMUSG00000025314	Ptprj
ENSMUSG00000025314	Ptprj
ENSMUSG00000002109	Ddb2
ENSMUSG00000027533	Fabp5
ENSMUSG00000033400	Agl
ENSMUSG00000033400	Agl
ENSMUSG00000028165	Cisd2
ENSMUSG00000078578	Ube2d3
ENSMUSG00000028161	Ppp3ca
ENSMUSG00000028161	Ppp3ca
ENSMUSG00000028161	Ppp3ca
ENSMUSG00000028161	Ppp3ca
-	-
ENSMUSG00000069072	Slc7a14
ENSMUSG00000069072	Slc7a14
ENSMUSG00000069072	Slc7a14
ENSMUSG00000025757	Hspa4l
ENSMUSG00000075700	Selt
ENSMUSG00000033981	Gria2
ENSMUSG00000033981	Gria2
ENSMUSG00000028109	Hormad1
ENSMUSG00000028109	Hormad1
ENSMUSG00000028109	Hormad1
ENSMUSG00000045327	6330549D23Rik
ENSMUSG00000036896	C1qc
ENSMUSG00000046447	Camk2n1
ENSMUSG00000040659	Efhd2
ENSMUSG00000080059	Rps19-ps3
ENSMUSG00000080059	Rps19-ps3
ENSMUSG00000041556	Fbxo2
ENSMUSG00000028278	Rragd
ENSMUSG00000085996	A830012C17Rik
ENSMUSG00000073888	Ccl27a
ENSMUSG00000073888	Ccl27a
ENSMUSG00000073888	Ccl27a
ENSMUSG00000071005	Ccl19
ENSMUSG00000071005	Ccl19
ENSMUSG00000071005	Ccl19
ENSMUSG00000071005	Ccl19
ENSMUSG00000035572	Dcaf10
ENSMUSG00000035572	Dcaf10
ENSMUSG00000029309	Sparcl1
ENSMUSG00000029309	Sparcl1
ENSMUSG00000029309	Sparcl1
ENSMUSG00000029309	Sparcl1
ENSMUSG00000029309	Sparcl1
ENSMUSG00000029309	Sparcl1
ENSMUSG00000029309	Sparcl1
ENSMUSG00000029309	Sparcl1
ENSMUSG00000029309	Sparcl1
ENSMUSG00000051339	2900026A02Rik
ENSMUSG00000051339	2900026A02Rik
ENSMUSG00000051339	2900026A02Rik
ENSMUSG00000037905	Bri3bp
ENSMUSG00000037905	Bri3bp
ENSMUSG00000037905	Bri3bp
ENSMUSG00000015950	Ncf1
ENSMUSG00000060261	Gtf2i
ENSMUSG00000040731	Eif4h
ENSMUSG00000051391	Ywhag
ENSMUSG00000029578	Wipi2
ENSMUSG00000097559	D430018E03Rik
ENSMUSG00000077185	Gm25091
ENSMUSG00000077185	Gm25091
ENSMUSG00000025747	Tyms
ENSMUSG00000037822	Smim14
ENSMUSG00000037822	Smim14
ENSMUSG00000034981	Parm1
ENSMUSG00000034724	Cnot6l
ENSMUSG00000035357	Pdzrn3
ENSMUSG00000040242	Fgfr1op2
ENSMUSG00000039985	Fam60a
ENSMUSG00000029838	Ptn
ENSMUSG00000029924	Slc37a3
ENSMUSG00000062519	Zfp398
ENSMUSG00000084950	Gm5577
ENSMUSG00000007891	Ctsd
ENSMUSG00000007891	Ctsd
ENSMUSG00000007891	Ctsd
ENSMUSG00000070140	Mir483
ENSMUSG00000031078	Cttn
ENSMUSG00000002984	Tomm40
ENSMUSG00000002984	Tomm40
ENSMUSG00000002984	Tomm40
ENSMUSG00000002984	Tomm40
ENSMUSG00000002984	Tomm40
ENSMUSG00000002984	Tomm40
ENSMUSG00000040907	Atp1a3
ENSMUSG00000040390	Map3k10
ENSMUSG00000065818	Snord35a
ENSMUSG00000078808	Vmn1r58
ENSMUSG00000078808	Vmn1r58
ENSMUSG00000031517	Gpm6a
ENSMUSG00000037852	Cpe
ENSMUSG00000037852	Cpe
ENSMUSG00000037852	Cpe
ENSMUSG00000037852	Cpe
ENSMUSG00000037852	Cpe
ENSMUSG00000037852	Cpe
ENSMUSG00000037852	Cpe
ENSMUSG00000037852	Cpe
ENSMUSG00000037852	Cpe
ENSMUSG00000037852	Cpe
ENSMUSG00000037852	Cpe
ENSMUSG00000037852	Cpe
ENSMUSG00000037852	Cpe
ENSMUSG00000037852	Cpe
ENSMUSG00000037852	Cpe
ENSMUSG00000037852	Cpe
ENSMUSG00000037852	Cpe
ENSMUSG00000037852	Cpe
ENSMUSG00000037852	Cpe
ENSMUSG00000037852	Cpe
ENSMUSG00000037852	Cpe
ENSMUSG00000037852	Cpe
ENSMUSG00000037852	Cpe
ENSMUSG00000037852	Cpe
ENSMUSG00000037852	Cpe
ENSMUSG00000037852	Cpe
ENSMUSG00000037852	Cpe
ENSMUSG00000037852	Cpe
ENSMUSG00000037852	Cpe
ENSMUSG00000037852	Cpe
ENSMUSG00000002346	Slc25a42
ENSMUSG00000031792	Usb1
ENSMUSG00000036564	Ndrg4
ENSMUSG00000036564	Ndrg4
ENSMUSG00000032803	Cdv3
ENSMUSG00000032803	Cdv3
ENSMUSG00000032803	Cdv3
ENSMUSG00000023262	Acy1
ENSMUSG00000032575	Manf
ENSMUSG00000088626	Gm23034
ENSMUSG00000088626	Gm23034
ENSMUSG00000032518	Rpsa
ENSMUSG00000079084	Ccdc82
ENSMUSG00000079084	Ccdc82
ENSMUSG00000079084	Ccdc82
-	-
-	-
-	-
ENSMUSG00000032336	Nptn
ENSMUSG00000032342	Mto1
ENSMUSG00000033419	Snap91
-	-
-	-
ENSMUSG00000034311	Kif4
ENSMUSG00000034311	Kif4
ENSMUSG00000025266	Gnl3l
ENSMUSG00000025266	Gnl3l
ENSMUSG00000025266	Gnl3l
ENSMUSG00000040586	Ofd1
ENSMUSG00000040586	Ofd1
ENSMUSG00000040586	Ofd1
ENSMUSG00000040586	Ofd1
ENSMUSG00000040586	Ofd1
ENSMUSG00000040586	Ofd1
ENSMUSG00000040586	Ofd1
ENSMUSG00000040586	Ofd1
ENSMUSG00000040586	Ofd1
ENSMUSG00000040586	Ofd1
ENSMUSG00000040586	Ofd1
ENSMUSG00000086877	A230072C01Rik
ENSMUSG00000092787	Mir5116
ENSMUSG00000031328	Flna
ENSMUSG00000025666	Tmem47

## Sheet: Sheet2
Ensemble gene id
Anxiety (PMID: 23638902)
Marker for Alzheimer's disease (PMID: 22482075)
Epilepsy (PMID: 23392471)
Epilepsy (PMID: 23392471)
Epilepsy (PMID: 23392471)
Epilepsy (PMID: 23392471)
Epilepsy (PMID: 23392471)
motor impairment (PMID: 9223328)
Epilepsy (PMID: 23392471)
Epilepsy (PMID: 23392471)
Epilepsy (PMID: 23392471)
Epilepsy (PMID: 23392471)
Epilepsy (PMID: 23392471)
Epilepsy (PMID: 23392471)
Epilepsy (PMID: 23392471)
developmental delay and speech disorders (PMID: 24603971)
Epilepsy (PMID: 23392471)
Epilepsy (PMID: 23392471)
Epilepsy(PMID: 23790754)
Deficit in cell migration/memory and learning (PMID: 15572692)
