# Supplementary material for: Genome-wide analysis of differential RNA editing in epilepsy
Source: Genome Res. 2017 Mar;27(3):440–50. doi: 10.1101/gr.210740.116 (PMC5340971; doi:10.1101/gr.210740.116)
Supplement: Supplemental Material [file supp_gr.210740.116_Supplement_Table_S4.xlsx]

## Sheet: GO for DE genes
Supplemental Table S4: Table summarizing functional enrichment of the differentially expressed genes by considering expressed genes as background.
Gene Ontology category	Gene Ontology terms	Raw Pvalue	FDR
biological process	single-organism process	1.32e-32	9.98e-29
biological process	signaling	7.14e-28	1.77e-24
biological process	single organism signaling	7.14e-28	1.77e-24
biological process	multicellular organismal process	1.17e-27	1.77e-24
biological process	single-multicellular organism process	1.17e-27	1.77e-24
biological process	cell communication	4.57e-27	5.76e-24
biological process	response to stimulus	1.39e-26	1.5e-23
biological process	signal transduction	8.83e-25	8.34e-22
biological process	cell surface receptor signaling pathway	4.11e-22	3.45e-19
biological process	system development	5.76e-22	4.35e-19
biological process	regulation of multicellular organismal process	3.25e-20	2.23e-17
biological process	biological regulation	1.28e-19	8.06e-17
biological process	cellular response to stimulus	4.36e-18	2.53e-15
biological process	organ development	1.08e-17	5.83e-15
biological process	anatomical structure development	1.34e-17	6.38e-15
biological process	multicellular organismal development	1.35e-17	6.38e-15
biological process	regulation of biological process	1.6e-16	7.11e-14
biological process	anatomical structure morphogenesis	3.26e-16	1.37e-13
biological process	developmental process	3.52e-16	1.4e-13
biological process	regulation of cellular process	5.9e-16	2.23e-13
biological process	immune system process	1.08e-15	3.89e-13
biological process	positive regulation of biological process	1.59e-15	5.46e-13
biological process	immune response	2.15e-15	7.06e-13
biological process	cell differentiation	1.3e-14	4.09e-12
biological process	cellular developmental process	3.83e-14	1.16e-11
biological process	regulation of response to stimulus	4.58e-14	1.33e-11
biological process	regulation of developmental process	3.19e-13	8.93e-11
biological process	regulation of signaling	1.34e-12	3.49e-10
biological process	cell development	1.33e-12	3.49e-10
biological process	defense response	1.54e-12	3.88e-10
biological process	response to chemical stimulus	1.6e-12	3.9e-10
biological process	tissue development	1.87e-12	4.42e-10
biological process	regulation of localization	2.58e-12	5.91e-10
biological process	anatomical structure formation involved in morphogenesis	2.69e-12	5.98e-10
biological process	regulation of cell proliferation	2.91e-12	6.28e-10
biological process	cell proliferation	3.43e-12	7.2e-10
biological process	regulation of cell communication	3.58e-12	7.31e-10
biological process	neuron differentiation	4.57e-12	9.09e-10
biological process	system process	6.63e-12	1.26e-09
biological process	generation of neurons	6.66e-12	1.26e-09
molecular function	molecular transducer activity	9.64e-17	9.1e-14
molecular function	signal transducer activity	9.64e-17	9.1e-14
molecular function	receptor activity	2.75e-15	1.73e-12
molecular function	signaling receptor activity	8.43e-15	3.98e-12
molecular function	protein binding	3.62e-14	1.37e-11
molecular function	transmembrane signaling receptor activity	1.64e-12	5.16e-10
molecular function	receptor binding	4.02e-12	1.08e-09
molecular function	calcium ion binding	9.93e-11	2.34e-08
molecular function	enzyme regulator activity	1.05e-07	2.2e-05
molecular function	substrate-specific transporter activity	2.17e-07	4.09e-05
molecular function	inorganic cation transmembrane transporter activity	2.74e-07	4.7e-05
molecular function	monovalent inorganic cation transmembrane transporter activity	3.18e-07	5e-05
molecular function	transporter activity	4.23e-07	6.14e-05
molecular function	cation transmembrane transporter activity	6.78e-07	9.14e-05
molecular function	substrate-specific transmembrane transporter activity	1.1e-06	0.0001
molecular function	ion transmembrane transporter activity	1.53e-06	0.0002
molecular function	transmembrane transporter activity	2.79e-06	0.0003
molecular function	G-protein coupled receptor activity	9.28e-06	0.001
molecular function	regulatory region DNA binding	1.25e-05	0.0012
molecular function	regulatory region nucleic acid binding	1.25e-05	0.0012
molecular function	sequence-specific DNA binding	1.31e-05	0.0012
molecular function	cation channel activity	1.37e-05	0.0012
molecular function	nucleoside-triphosphatase regulator activity	1.74e-05	0.0014
molecular function	substrate-specific channel activity	1.67e-05	0.0014
molecular function	Ras guanyl-nucleotide exchange factor activity	2.27e-05	0.0016
molecular function	nucleic acid binding transcription factor activity	2.14e-05	0.0016
molecular function	sequence-specific DNA binding transcription factor activity	2.79e-05	0.0018
molecular function	gated channel activity	2.72e-05	0.0018
molecular function	ion channel activity	2.83e-05	0.0018
molecular function	ion gated channel activity	2.72e-05	0.0018
molecular function	transmembrane receptor protein kinase activity	3.81e-05	0.0023
molecular function	G-protein coupled receptor binding	4.13e-05	0.0024
molecular function	transcription regulatory region DNA binding	4.54e-05	0.0026
molecular function	lipid binding	6.56e-05	0.0036
molecular function	protein tyrosine kinase activity	7.06e-05	0.0037
molecular function	GTPase regulator activity	7e-05	0.0037
molecular function	metal ion transmembrane transporter activity	8.61e-05	0.0042
molecular function	passive transmembrane transporter activity	8.52e-05	0.0042
molecular function	channel activity	8.52e-05	0.0042
molecular function	sequence-specific DNA binding RNA polymerase II transcription factor activity	0.0001	0.0046
cellular component	cell periphery	6.99e-32	6.15e-29
cellular component	plasma membrane	2.18e-30	9.59e-28
cellular component	extracellular region	2.17e-25	6.37e-23
cellular component	membrane	1.27e-22	2.79e-20
cellular component	extracellular region part	7.24e-18	1.27e-15
cellular component	membrane part	2.55e-16	3.74e-14
cellular component	intrinsic to membrane	1.29e-13	1.62e-11
cellular component	plasma membrane part	1.91e-13	2.1e-11
cellular component	extracellular space	2.17e-13	2.12e-11
cellular component	extracellular matrix	3.04e-13	2.68e-11
cellular component	integral to membrane	8.55e-13	6.84e-11
cellular component	neuron projection	3.86e-11	2.83e-09
cellular component	proteinaceous extracellular matrix	4.77e-11	3.23e-09
cellular component	cell surface	6.27e-11	3.94e-09
cellular component	cell projection	2.21e-10	1.3e-08
cellular component	extracellular matrix part	6.73e-09	3.7e-07
cellular component	external side of plasma membrane	2e-07	1.04e-05
cellular component	receptor complex	1.26e-06	6.16e-05
cellular component	cell projection part	1.84e-06	8.52e-05
cellular component	axon	5.53e-06	0.0002
cellular component	synapse	4.87e-06	0.0002
cellular component	cell body	5.19e-06	0.0002
cellular component	cell junction	4.35e-06	0.0002
cellular component	neuronal cell body	1.34e-05	0.0005
cellular component	basement membrane	1.77e-05	0.0006
cellular component	intrinsic to plasma membrane	1.79e-05	0.0006
cellular component	integral to plasma membrane	1.95e-05	0.0006
cellular component	synapse part	4.07e-05	0.0013
cellular component	cell leading edge	6.38e-05	0.0019
cellular component	apical plasma membrane	0.0001	0.0028
cellular component	collagen	0.0001	0.0028
cellular component	basolateral plasma membrane	0.0002	0.005
cellular component	dendrite	0.0002	0.005
cellular component	axon part	0.0002	0.005
cellular component	apical part of cell	0.0002	0.005
cellular component	MHC protein complex	0.0005	0.0122
cellular component	membrane raft	0.0007	0.0166
cellular component	synaptic vesicle	0.0011	0.0255
cellular component	basal lamina	0.0012	0.0271
cellular component	perinuclear region of cytoplasm	0.0017	0.0374
